# Supplementary material for: Photoemission study on the valence band of a β-FeSi2 thin film using synchrotron radiation
Source: Royal Society of Chemistry journal article supplement (doi:10.1039/c0dt01832e), 2011-01-01
Supplement: c0dt01832e.pdf [file c0dt01832e.pdf]

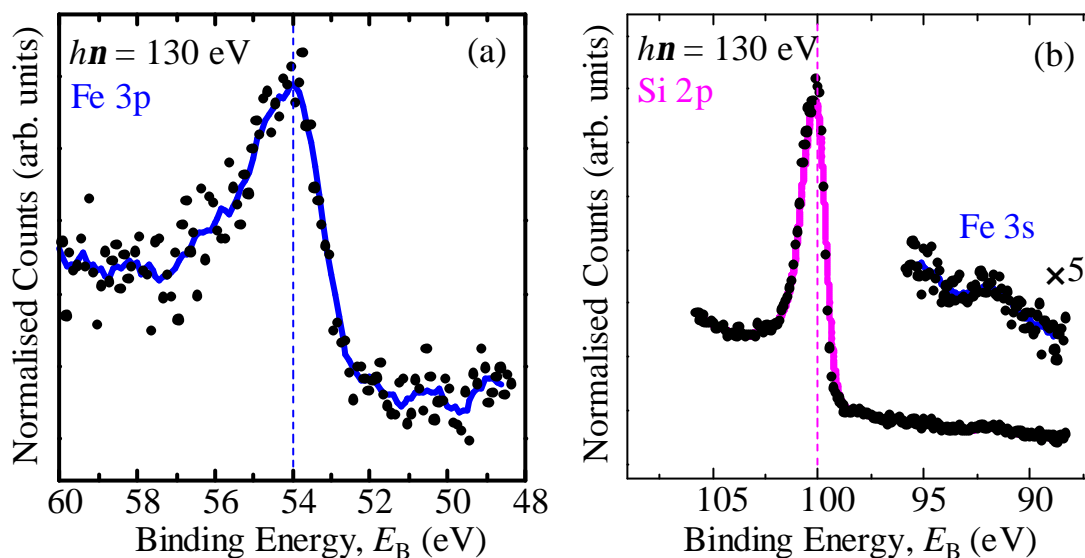

**Fig. 1** Core-level UPS spectra for (a) the Fe 3p and (b) Si 2p levels of the  $\beta$ -FeSi<sub>2</sub> thin film measured at  $h\nu = 130$  eV. Each point shows the photoelectron count normalized by photon flux, and averaging three neighbouring points of both sides gives solid lines.

5

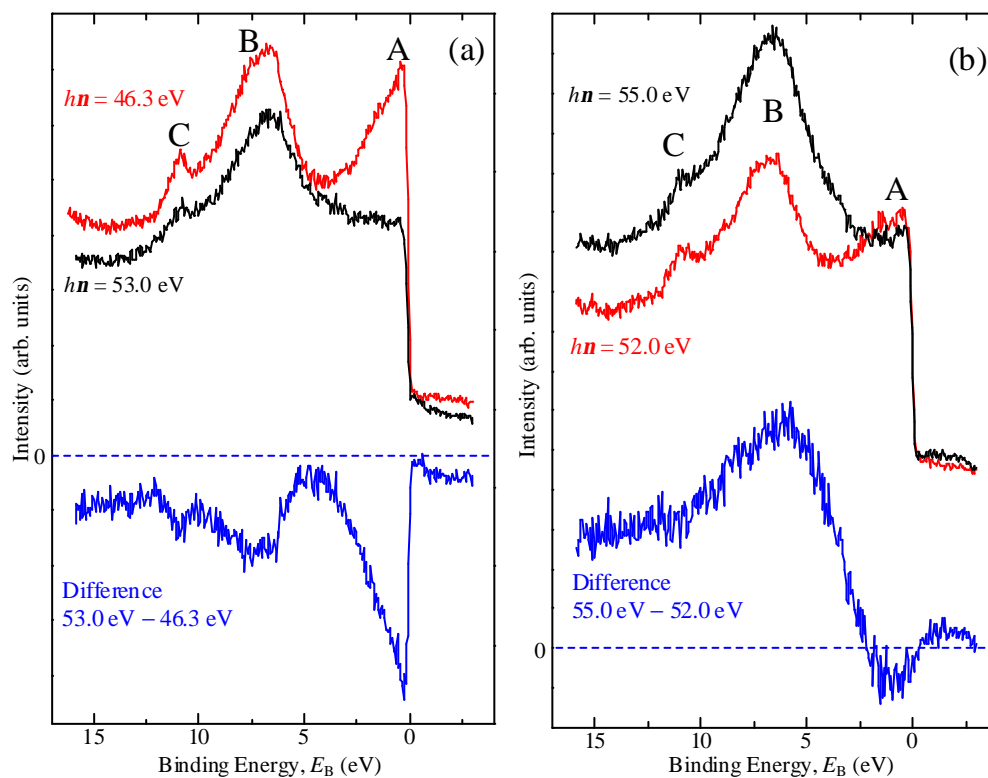

**Fig. 2** Spectral difference (a) between just on-resonance and after-resonance and (b) between after and before resonance at the Fe 3p core-level excitation.
